# Supplementary material for: The Amyloid Fibril-Forming β-Sheet Regions of Amyloid β and α-Synuclein Preferentially Interact with the Molecular Chaperone 14-3-3ζ
Source: MDPI journal article supplement (doi:10.3390/molecules26206120), 2021-10-11
Supplement: s1 [file s1]

## Inhibition of seeded $A\beta_{40}$ fibril formation

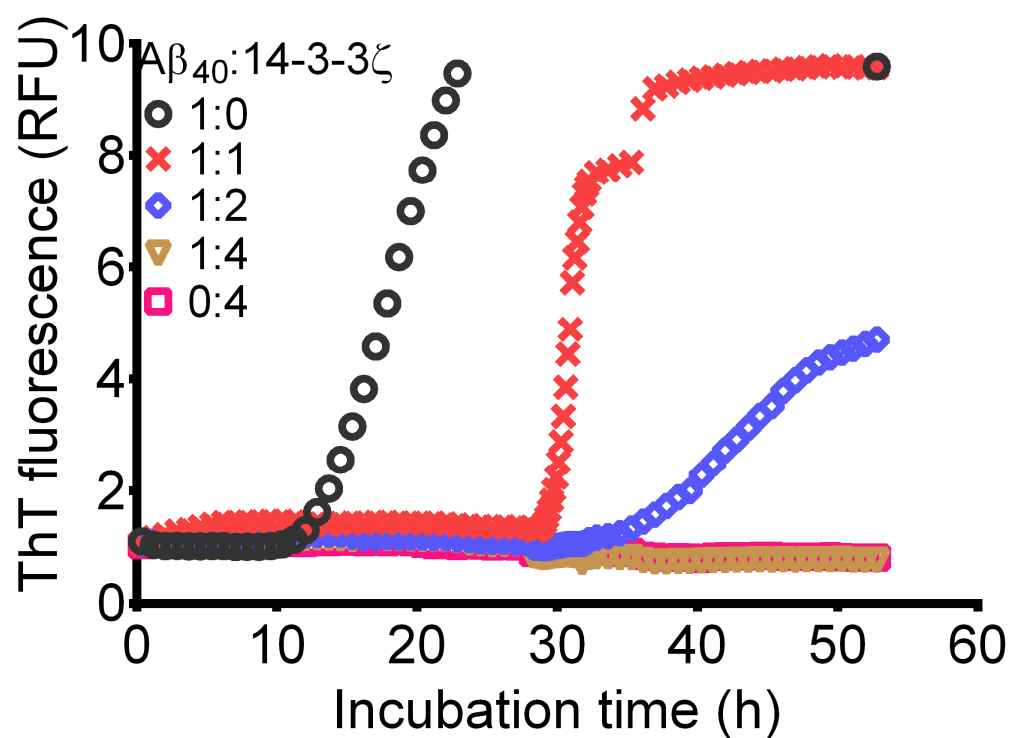

**Figure S1.** Amyloid fibril formation, as monitored by ThT fluorescence, of seeded  $A\beta_{40}$  (15  $\mu$ M) in the absence and presence of 14-3-3 $\zeta$  at 1.0:1.0-4.0 molar ratios of  $A\beta_{40}$ :14-3-3 $\zeta$ .

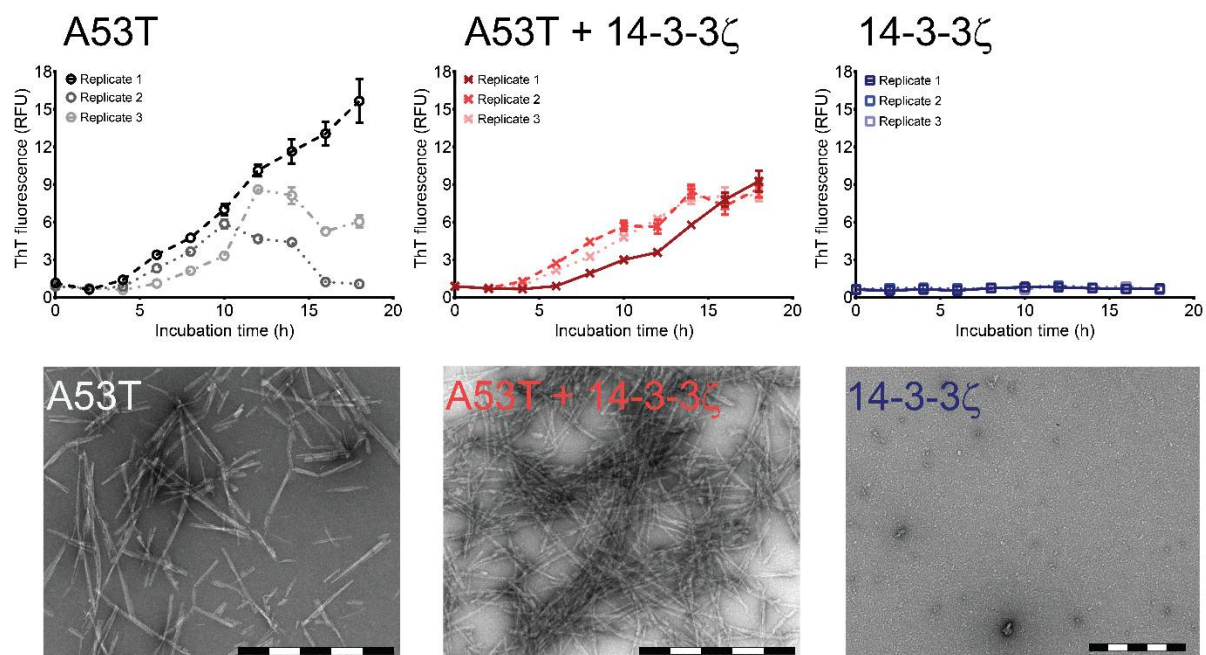

**Figure S2.** Top: Amyloid fibril formation, as monitored by ThT fluorescence, of A53T  $\alpha$ -syn (70  $\mu$ M) in the absence of 14-3-3 $\zeta$  and at a 1.0:1.0 molar ratio of A53T  $\alpha$ -syn: 14-3-3 $\zeta$ . The decrease in ThT fluorescence for A53T  $\alpha$ -syn on its own after ~ 12 hours of incubation most likely arises from precipitation of the fibrillar protein. The error bars represent the standard deviation of three technical replicates. Below: TEM images of these samples after incubation for 22 hours at 37  $^{\circ}$ C. Also shown on the right are the time-dependent ThT data for 14-3-3 $\zeta$  on its own and a TEM image of 14-3-3 $\zeta$  after incubation for 22 hours at 37  $^{\circ}$ C which provide no evidence of large-scale aggregation and fibril formation of 14-3-3 $\zeta$ . Scale bars in all TEM images represent 1  $\mu$ m.
